# Supplementary material
Source: PubMed Central journal article supplement (PMC3266993)
Supplement: NIHMS322242-supplement-supplement_1.pdf [file NIHMS322242-supplement-supplement_1.pdf]

554

555 *Supplementary Material*

556 Table S1

557 **Mean group weights and arterial blood gas measurement**

| Cohort | SA             | Weight (g) | p <sub>a</sub> CO <sub>2</sub> -pre | p <sub>a</sub> CO <sub>2</sub> -post |
|--------|----------------|------------|-------------------------------------|--------------------------------------|
| 1      | <i>Vehicle</i> | 305±4      | 41.4±1.0                            | 35.7±1.3                             |
| 2      | <i>Ghrelin</i> | 279±5      | 44.6±1.9                            | 38.5±2.1                             |

558

559 Abbreviations: p<sub>a</sub>CO<sub>2</sub>-pre; partial pressure of arterial CO<sub>2</sub> measured at the beginning of the MR  
560 scan. p<sub>a</sub>CO<sub>2</sub>-post partial pressure of arterial CO<sub>2</sub> measured at the end of MR scan. Arterial blood  
561 gas values are expressed in mmHg (mean ± SEM).

562

563

564

565

566

567 **Figure S1**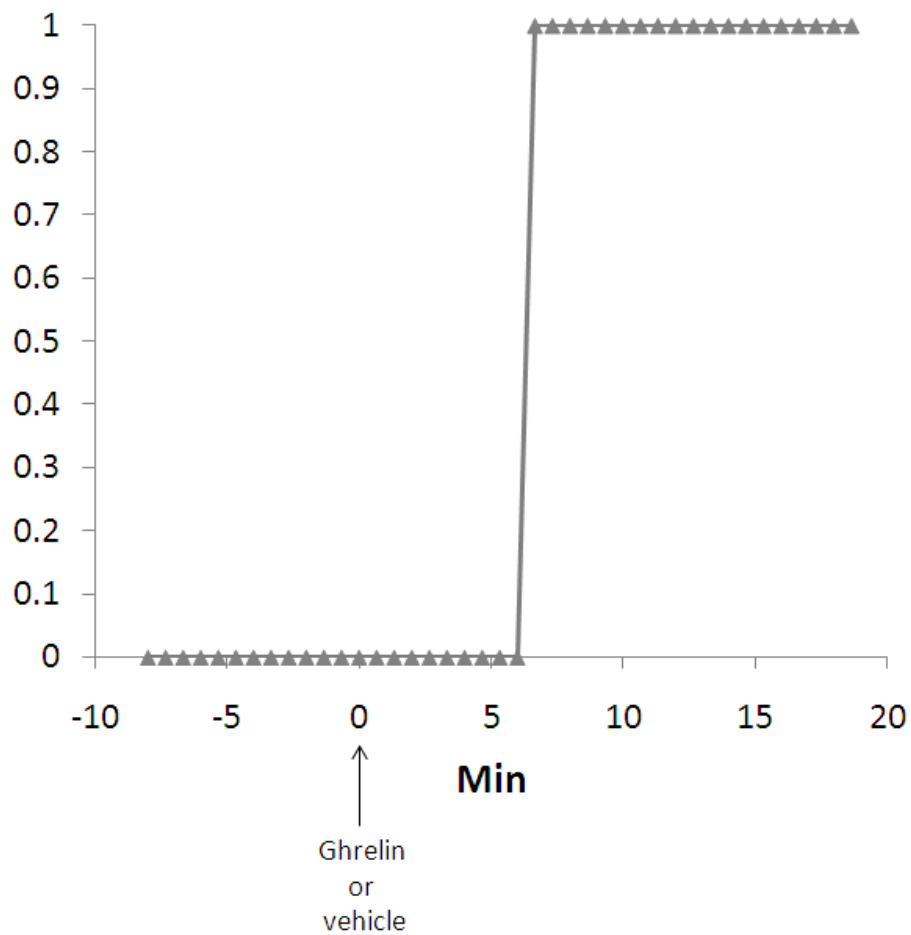

568

569 Boxcar function used for GLM voxelwise statistics. The regressor was designed to capture the  
570 “delayed” response to GHR observed in the VOI analysis.
